# Supplementary material for: Chronic alcohol exposure promotes HCC stemness and metastasis through β-catenin/miR-22-3p/TET2 axis
Source: publisher site journal article supplement (doi:10.18632/aging.203059), 2021-05-21
Supplement: Supplementary file [file aging-v13i10-203059-supplementary-material-SD1.pdf]

**SUPPLEMENTARY FIGURES**

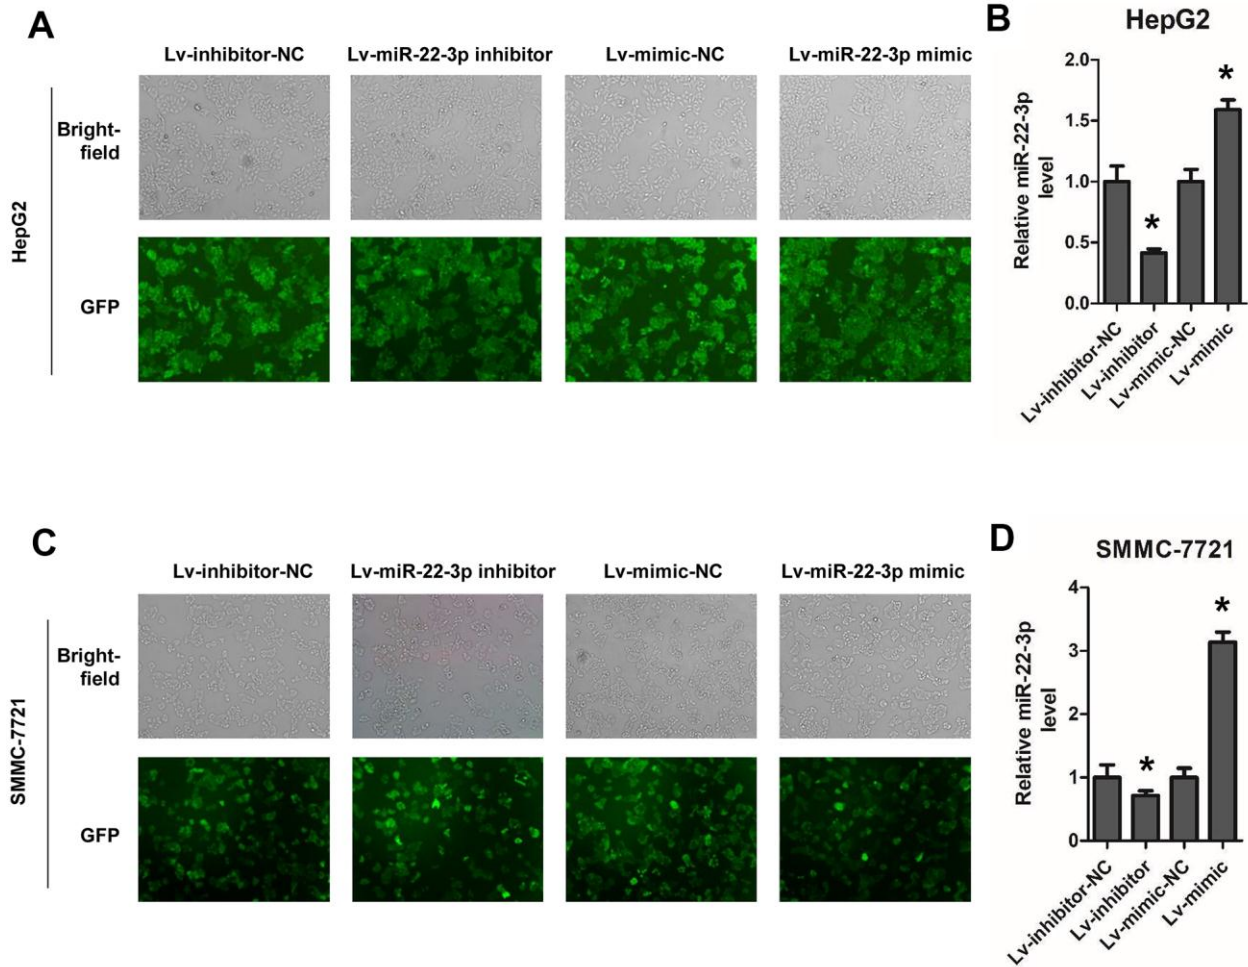

**Supplementary Figure 1. Transfection efficiency of lentivirus miR-22-3p inhibitor and lentivirus miR-22-3p mimic.** (A) GFP positive pictures showed the HepG2 cells successfully transfected with lentivirus miR-22-3p inhibitor and lentivirus miR-22-3p mimic. (B) Relative miR-22-3p level in HepG2 cells successfully infected with lentivirus expressing miR-22-3p inhibitor or miR-22-3p mimic. \* $P < 0.05$ . (C) GFP positive pictures showed the SMMC-7721 cells successfully infected with lentivirus expressing miR-22-3p inhibitor or miR-22-3p mimic. (D) Relative miR-22-3p level in SMMC-7721 cells successfully infected with lentivirus expressing miR-22-3p inhibitor or miR-22-3p mimic. \* $P < 0.05$ .

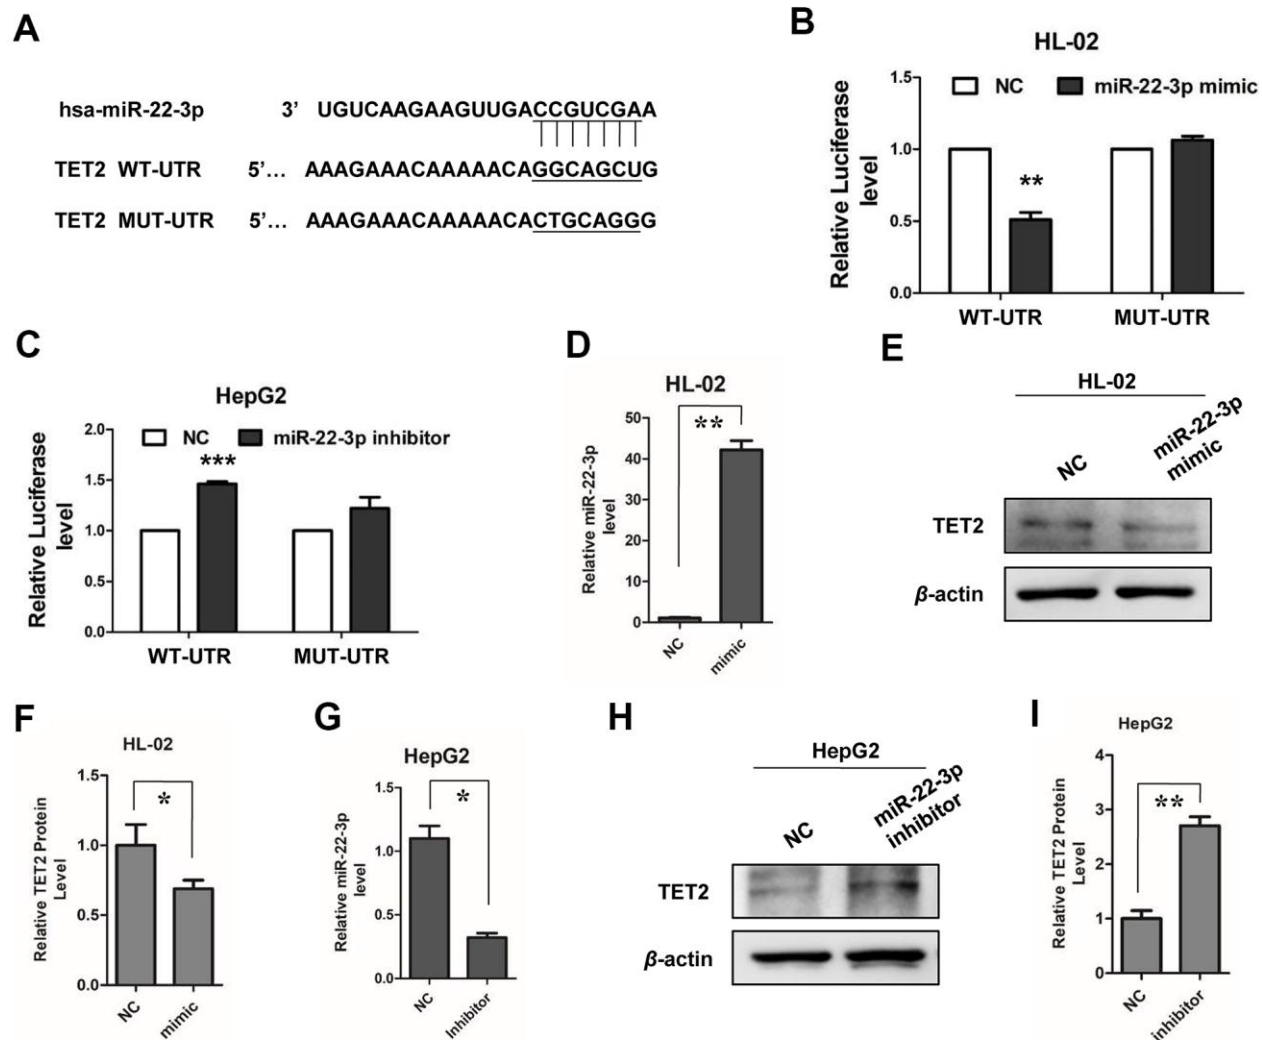

**Supplementary Figure 2. TET2 is a direct downstream target of miR-22-3p.** (A) Binding site of the TET2 3'-UTR and miR-22-3p. (B, C) Dual-luciferase activity of wildtype (WT) and mutant (MUT) TET2 3'-UTR reporter constructs in the presence of miR-22-3p.  $**P < 0.01$ ,  $***P < 0.001$ . (D) miR-22-3p level in HL-02 cells transfected with miR-22-3p mimic.  $**P < 0.01$ . (E, F) Protein level of TET2 in HL-02 cells transfected with miR-22-3p mimic.  $*P < 0.05$ . (G) miR-22-3p level in HepG2 cells transfected with miR-22-3p inhibitor.  $*P < 0.05$ . (H, I) Protein level of TET2 in HepG2 cells transfected with miR-22-3p inhibitor.  $**P < 0.01$ .

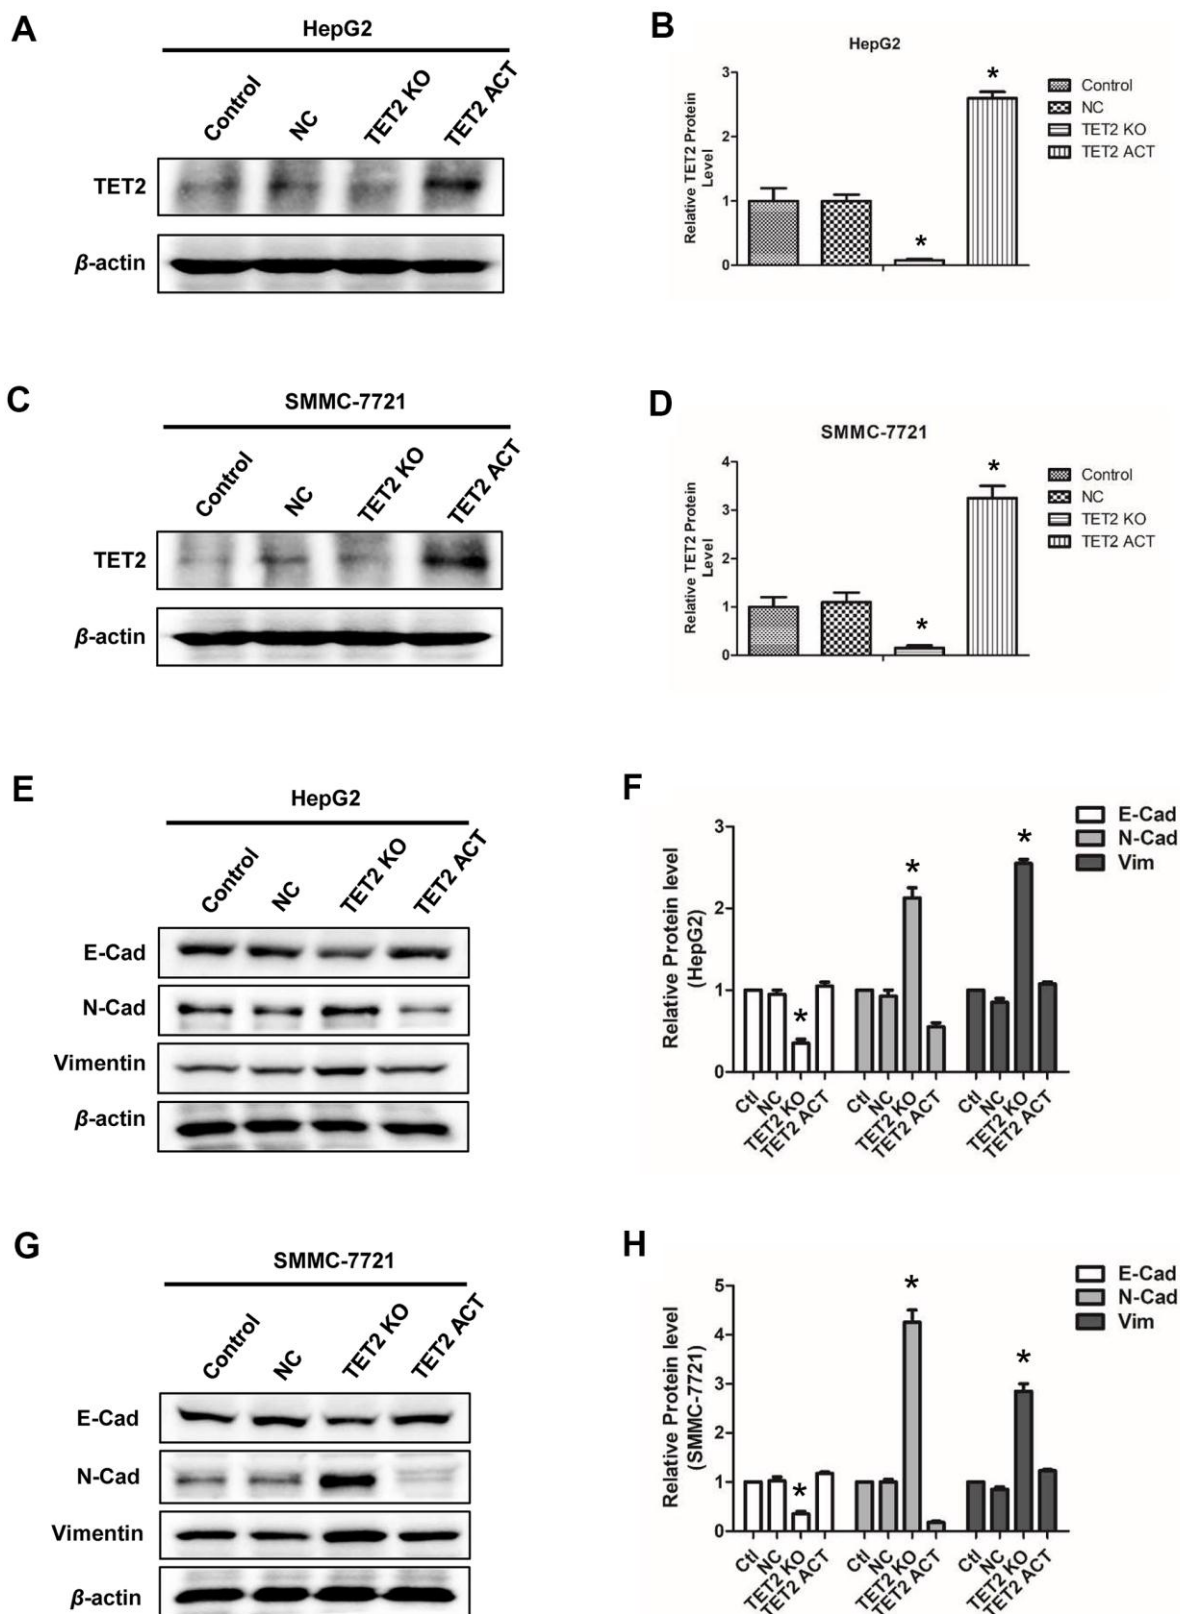

**Supplementary Figure 3. Expression of EMT markers in HCC cells.** (A–D) The protein level of TET2 in HCC cells transfected with TET2 CRISPR/Cas9Knockout (KO) and TET2 CRISPR/Cas9Activation (ACT) plasmid. \* $P < 0.05$ . (E–H) Expression of EMT related gene protein of HCC cells in control, negative-control, TET2 Knockout (KO) and TET2 Activation (ACT) groups. \* $P < 0.05$ .

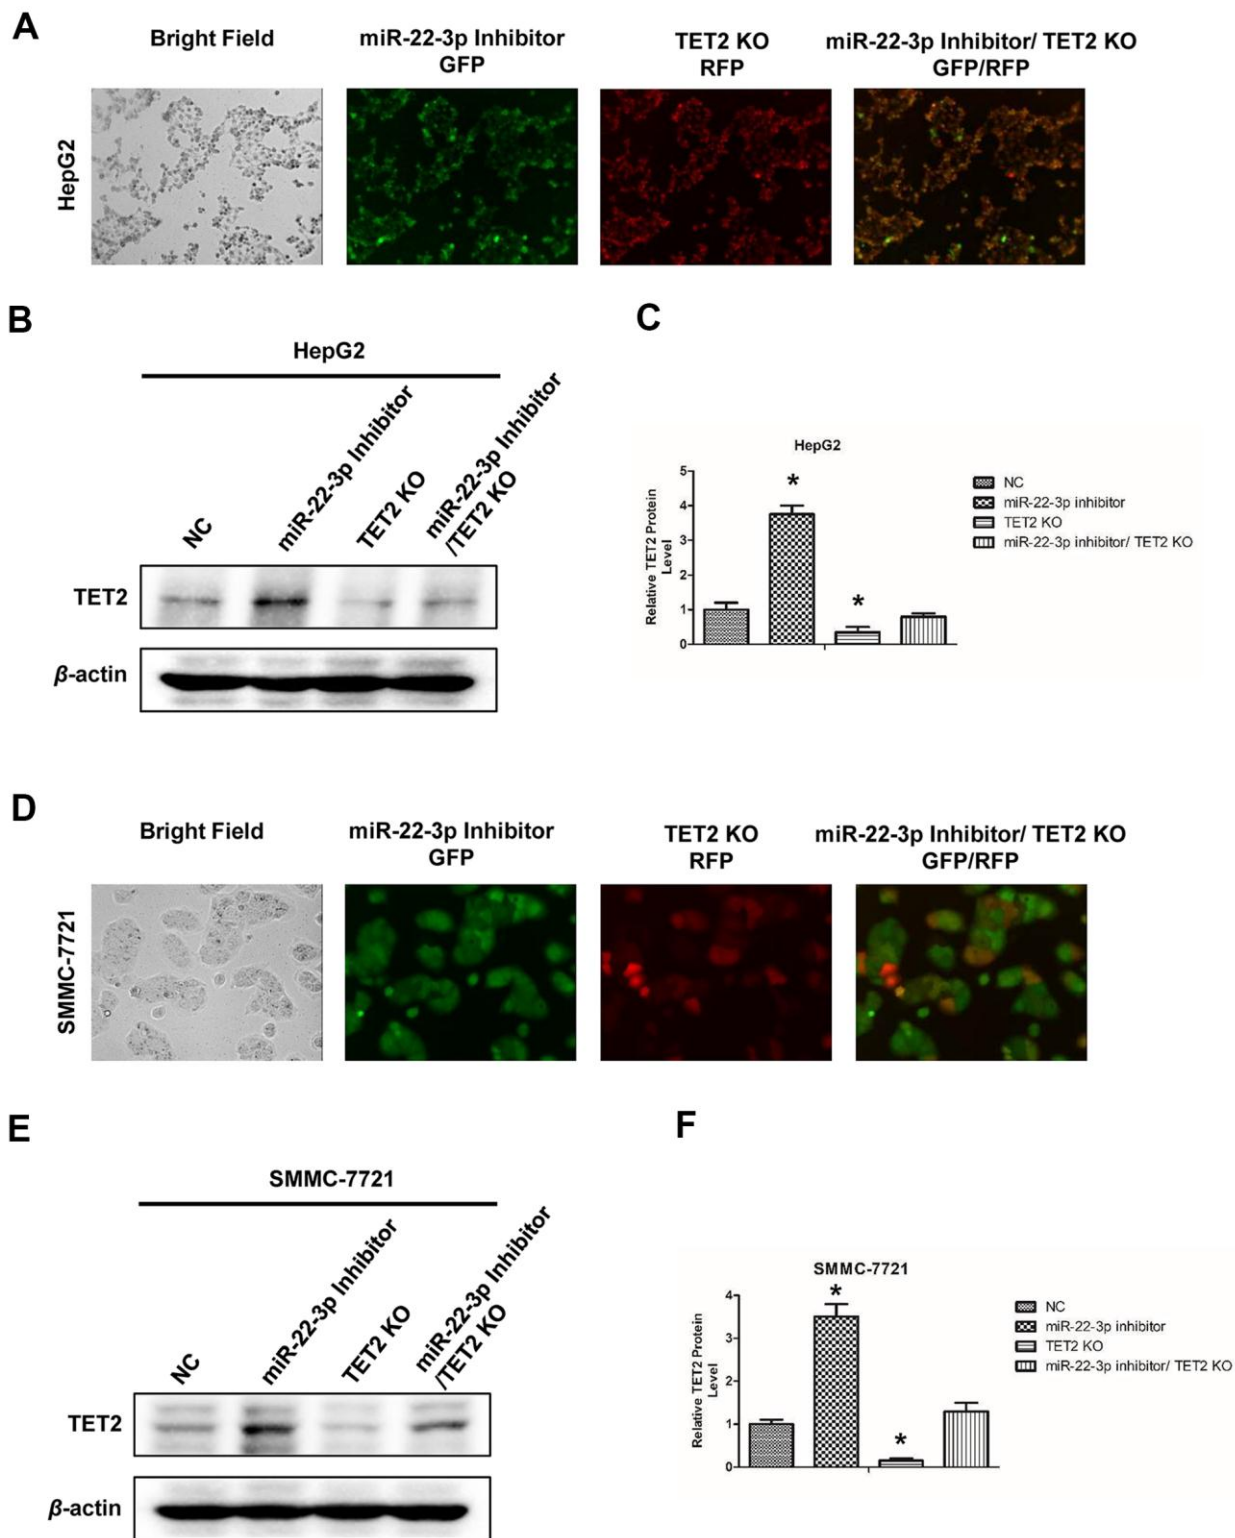

**Supplementary Figure 4. Co-expression efficiency of lentivirus miR-22-3p inhibitor and TET2 CRISPR/Cas9 KO plasmid.** (A) GFP and RFP positive pictures showed the HepG2 cells successfully infected with lentivirus expressing miR-22-3p inhibitor and transfected with TET2 CRISPR/Cas9 KO plasmid. (B, C) Relative TET2 level in HepG2 cells successfully infected with lentivirus expressing miR-22-3p inhibitor and transfected with TET2 CRISPR/Cas9 KO plasmid. \* $P < 0.05$ . (D) GFP and RFP positive pictures showed the SMMC-7721 cells successfully infected with lentivirus expressing miR-22-3p inhibitor and transfected with TET2 CRISPR/Cas9 KO plasmid. (E, F) Relative TET2 level in SMMC-7721 cells successfully infected with lentivirus expressing miR-22-3p inhibitor and transfected with TET2 CRISPR/Cas9 KO plasmid. \* $P < 0.05$ .

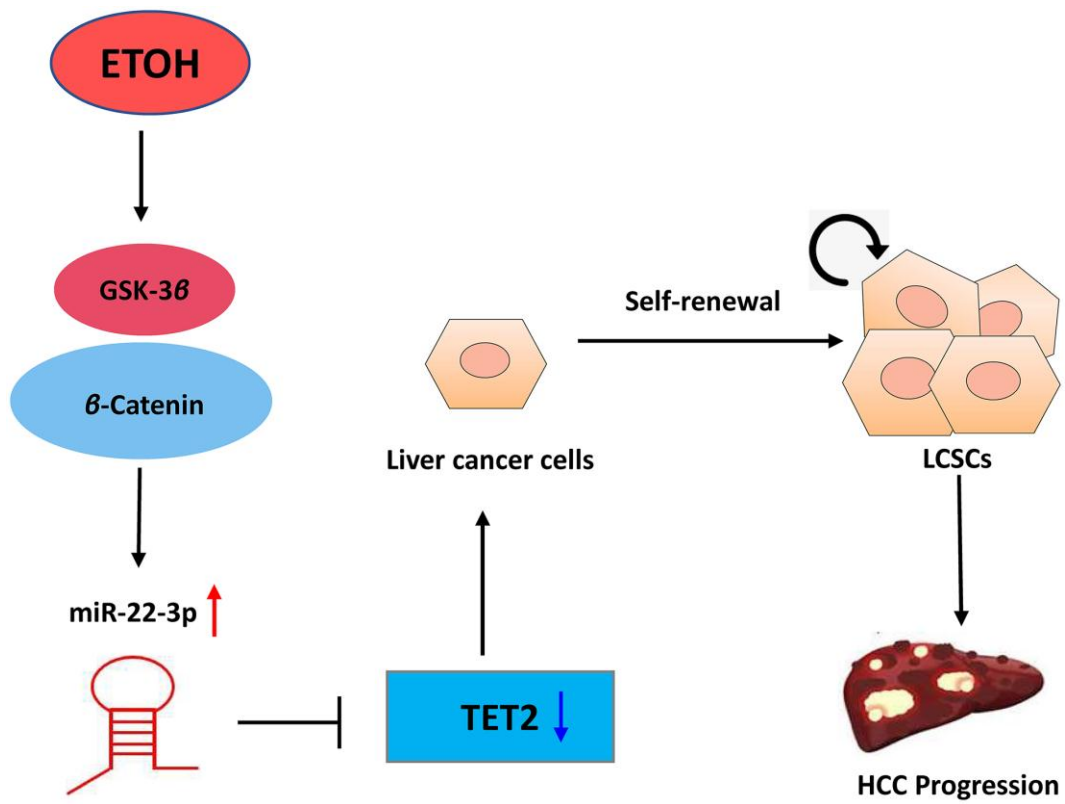

**Supplementary Figure 5. Working model of  $\beta$ -catenin/miR-22-3p/TET2 axis.** Chronic ethanol exposure promotes HCC progression through  $\beta$ -catenin/miR-22-3p/TET2 axis.
